# Supplementary material
Source: PubMed Central journal article supplement (PMC6478515)
Supplement: NIHMS1520781-supplement-8.pdf [file NIHMS1520781-supplement-8.pdf]

**Table S3.** Paired differences between the predicted eGFR values based on the CRISP model and the observed data in the HALT validation cohort

| Age at baseline (Yr) | <30             |    | 30-40           |     | 40-50           |     | 50-60           |    |
|----------------------|-----------------|----|-----------------|-----|-----------------|-----|-----------------|----|
|                      | Diff. (SE)      | n  | Diff. (SE)      | n   | Diff. (SE)      | n   | Diff. (SE)      | n  |
| Class A              |                 |    | 1.93<br>(4.60)  | 10  | 4.02<br>(2.44)  | 27  | 1.35<br>(5.54)  | 11 |
| Class B              | 5.85<br>(3.11)  | 14 | 4.83<br>(2.13)  | 40  | 3.45<br>(1.75)  | 87  | 4.60<br>(3.09)  | 38 |
| Class C              | 2.60<br>(2.67)  | 33 | 2.05<br>(1.84)  | 101 | 7.93<br>(1.89)  | 121 | 17.76<br>(2.63) | 42 |
| Class D              | -3.82<br>(3.07) | 35 | 0.04<br>(2.30)  | 67  | 20.04<br>(2.74) | 62  | 46.63<br>(3.80) | 20 |
| Class E              | -1.48<br>(3.93) | 37 | 13.48<br>(3.58) | 39  | 25.42<br>(6.09) | 11  |                 |    |

Data show observed minus predicted values (Diff.) and their standard errors (SE) in mL/min/1.73 m<sup>2</sup>. Positive values mean that the model underestimated the observed HALT data.

n, number of HALT patients in each category
